# Supplementary material for: Flexibility In Vitro of Amino Acid 226 in the Receptor-Binding Site of an H9 Subtype Influenza A Virus and Its Effect In Vivo on Virus Replication, Tropism, and Transmission
Source: PubMed Central journal article supplement (PMC6401463; doi:10.1128/jvi.02011-18), 2019-03-05
Supplement: JVI.02011-18-s0001.pdf [file JVI.02011-18-s0001.pdf]

Supplementary Table 1. List of glycan structures present on the array

| Glycan # | Common Name                                                                                                                                                                                                                                      | Structure                                                                             |
|----------|--------------------------------------------------------------------------------------------------------------------------------------------------------------------------------------------------------------------------------------------------|---------------------------------------------------------------------------------------|
| 1        | Gal $\beta$ (1-4)GlcNAc $\beta$ -ethyl-NH <sub>2</sub>                                                                                                                                                                                           | 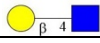   |
| 2        | Gal $\beta$ (1-4)GlcNAc $\beta$ (1-3)Gal $\beta$ (1-3)GalNAca-Thr-NH <sub>2</sub>                                                                                                                                                                |    |
| 3        | Gal $\beta$ (1-4)GlcNAc $\beta$ (1-6)[Gal $\beta$ (1-3)]-GalNAca-Thr-NH <sub>2</sub>                                                                                                                                                             |    |
| 4        | Gal $\beta$ (1-4)GlcNAc $\beta$ (1-3)GalNAca-Thr-NH <sub>2</sub>                                                                                                                                                                                 |    |
| 5        | Gal $\beta$ (1-4)GlcNAc $\beta$ (1-3)[Gal $\beta$ (1-4)GlcNAc $\beta$ (1-6)]-GalNAca-Thr-NH <sub>2</sub>                                                                                                                                         |    |
| 6        | Gal $\beta$ (1-4)GlcNAc $\beta$ (1-6)GalNAca-Thr-NH <sub>2</sub>                                                                                                                                                                                 |    |
| 7        | Gal $\beta$ (1-4)GlcNAc $\beta$ (1-2)Mana(1-3)[Gal $\beta$ (1-4)GlcNAc $\beta$ (1-2)Mana(1-6)]-Man $\beta$ (1-4)GlcNAc $\beta$ (1-4)GlcNAc $\beta$ -Asn-NH <sub>2</sub>                                                                          |    |
| 8        | Gal $\beta$ (1-4)GlcNAc $\beta$ (1-2)Mana(1-3)[Gal $\beta$ (1-4)GlcNAc $\beta$ (1-2)Mana(1-6)]-Man $\beta$ (1-4)GlcNAc $\beta$ (1-4)[Fuca(1-6)]-GlcNAc $\beta$ -Asn-Ser-Thr-NH <sub>2</sub>                                                      |    |
| 9        | Gal $\beta$ (1-4)GlcNAc $\beta$ (1-2)Mana(1-3){Gal $\beta$ (1-4)GlcNAc $\beta$ (1-2)[Gal $\beta$ (1-4)GlcNAc $\beta$ (1-2)]-Mana(1-6)}-Man $\beta$ (1-4)GlcNAc $\beta$ (1-4)GlcNAc $\beta$ -Asn-Lys-NH <sub>2</sub>                              |   |
| 10       | Gal $\beta$ (1-4)GlcNAc $\beta$ (1-2)Mana(1-3){Gal $\beta$ (1-4)GlcNAc $\beta$ (1-2)[Gal $\beta$ (1-4)GlcNAc $\beta$ (1-2)]-Mana(1-6)}-Man $\beta$ (1-4)GlcNAc $\beta$ (1-4)[Fuca(1-6)]-GlcNAc $\beta$ -(Lys-Val-Ala)Asn-Lys-Thr-NH <sub>2</sub> |  |
| 11       | NeuAca(2-3)Gal $\beta$ (1-4)6-O-sulfo-GlcNAc $\beta$ -propyl-NH <sub>2</sub>                                                                                                                                                                     |  |
| 12       | NeuAca(2-3)Gal $\beta$ (1-4)[Fuca(1-3)]-6-O-sulfo-GlcNAc $\beta$ -propyl-NH <sub>2</sub>                                                                                                                                                         |  |
| 13       | NeuAca(2-3)6-O-sulfo-Gal $\beta$ (1-4)GlcNAc $\beta$ -ethyl-NH <sub>2</sub>                                                                                                                                                                      |  |
| 14       | NeuAca(2-3)6-O-sulfo-Gal $\beta$ (1-4)[Fuca(1-3)]-GlcNAc $\beta$ -propyl-NH <sub>2</sub>                                                                                                                                                         |  |
| 15       | NeuAca(2-3)Gal $\beta$ (1-3)6-O-sulfo-GlcNAc $\beta$ -propyl-NH <sub>2</sub>                                                                                                                                                                     |  |
| 16       | NeuAca(2-3)Gal $\beta$ (1-4)Glc $\beta$ -ethyl-NH <sub>2</sub>                                                                                                                                                                                   |  |
| 17       | NeuAca(2-3)Gal $\beta$ (1-4)GlcNAc $\beta$ -ethyl-NH <sub>2</sub>                                                                                                                                                                                |  |
| 18       | NeuAca(2-3)Gal $\beta$ (1-4)GlcNAc $\beta$ (1-3)Gal $\beta$ (1-4)GlcNAc $\beta$ -ethyl-NH <sub>2</sub>                                                                                                                                           |  |
| 19       | NeuAca(2-3)Gal $\beta$ (1-4)GlcNAc $\beta$ (1-3)Gal $\beta$ (1-3)Gal $\beta$ (1-4)GlcNAc $\beta$ -ethyl-NH <sub>2</sub>                                                                                                                          |  |

| Glycan # | Common Name                                                                                                                                                                                          | Structure |
|----------|------------------------------------------------------------------------------------------------------------------------------------------------------------------------------------------------------|-----------|
| 20       | NeuAca(2-3)GalNAcβ(1-4)GlcNAcβ-ethyl-NH2                                                                                                                                                             |           |
| 21       | NeuAca(2-3)Galβ(1-3)GlcNAcβ-ethyl-NH2                                                                                                                                                                |           |
| 22       | NeuAca(2-3)Galβ(1-3)GlcNAcβ(1-3)Galβ(1-4)GlcNAcβ-ethyl-NH2                                                                                                                                           |           |
| 23       | NeuAca(2-3)Galβ(1-3)GlcNAcβ(1-3)Galβ(1-3)GlcNAcβ-ethyl-NH2                                                                                                                                           |           |
| 24       | NeuAca(2-3)Galβ(1-3)GalNAcβ(1-3)Gala(1-4)Galβ(1-4)Glcβ-ethyl-NH2                                                                                                                                     |           |
| 25       | NeuAca(2-3)Galβ(1-3)GalNAca-Thr-NH2                                                                                                                                                                  |           |
| 26       | NeuAca(2-3)Galβ(1-4)GlcNAcβ(1-3)Galβ(1-3)GalNAca-Thr-NH2                                                                                                                                             |           |
| 27       | NeuAca(2-3)Galβ(1-4)GlcNAcβ(1-3)Galβ(1-3)GalNAca-Thr-NH2                                                                                                                                             |           |
| 28       | NeuAca(2-3)Galβ(1-4)GlcNAcβ(1-3)Galβ(1-4)GlcNAcβ(1-3)Galβ(1-4)GlcNAcβ(1-3)Galβ(1-3)GalNAca-Thr-NH2                                                                                                   |           |
| 29       | NeuAca(2-3)Galβ(1-4)GlcNAcβ(1-3)Galβ(1-4)GlcNAcβ(1-3)Galβ(1-4)GlcNAcβ(1-3)Galβ(1-4)GlcNAcβ(1-3)Galβ(1-3)GalNAca-Thr-NH2                                                                              |           |
| 30       | NeuAca(2-3)Galβ(1-4)GlcNAcβ(1-3)Galβ(1-4)GlcNAcβ(1-3)Galβ(1-4)GlcNAcβ(1-3)Galβ(1-4)GlcNAcβ(1-3)Galβ(1-4)GlcNAcβ(1-3)Galβ(1-3)GalNAca-Thr-NH2                                                         |           |
| 31       | NeuAca(2-3)Galβ(1-4)GlcNAcβ(1-6)[Galβ(1-3)]-GalNAca-Thr-NH2                                                                                                                                          |           |
| 32       | NeuAca(2-3)Galβ(1-4)GlcNAcβ(1-3)Galβ(1-4)GlcNAcβ(1-6)[Galβ(1-3)]-GalNAca-Thr-NH2                                                                                                                     |           |
| 33       | NeuAca(2-3)Galβ(1-4)GlcNAcβ(1-3)Galβ(1-4)GlcNAcβ(1-3)Galβ(1-4)GlcNAcβ(1-6)[Galβ(1-3)]-GalNAca-Thr-NH2                                                                                                |           |
| 34       | NeuAca(2-3)Galβ(1-4)GlcNAcβ(1-3)Galβ(1-4)GlcNAcβ(1-3)Galβ(1-4)GlcNAcβ(1-3)Galβ(1-4)GlcNAcβ(1-6)[Galβ(1-3)]-GalNAca-Thr-NH2                                                                           |           |
| 35       | NeuAca(2-3)Galβ(1-4)GlcNAcβ(1-3)Galβ(1-4)GlcNAcβ(1-3)Galβ(1-4)GlcNAcβ(1-3)Galβ(1-4)GlcNAcβ(1-3)Galβ(1-4)GlcNAcβ(1-6)[Galβ(1-3)]-GalNAca-Thr-NH2                                                      |           |
| 36       | NeuAca(2-3)Galβ(1-4)GlcNAcβ(1-3)Galβ(1-4)GlcNAcβ(1-3)Galβ(1-4)GlcNAcβ(1-3)Galβ(1-4)GlcNAcβ(1-6)[NeuAca(2-3)Galβ(1-4)GlcNAcβ(1-3)Galβ(1-4)GlcNAcβ(1-3)Galβ(1-4)GlcNAcβ(1-3)Galβ(1-3)]-GalNAca-Thr-NH2 |           |

| Glycan # | Common Name                                                                                                                                                                                                      | Structure |
|----------|------------------------------------------------------------------------------------------------------------------------------------------------------------------------------------------------------------------|-----------|
| 37       | NeuAca(2-3)Galβ(1-4)GlcNAcβ(1-3)Galβ(1-4)GlcNAcβ(1-3)Galβ(1-4)GlcNAcβ(1-3)Galβ(1-4)GlcNAcβ(1-6)[NeuAca(2-3)Galβ(1-4)GlcNAcβ(1-3)Galβ(1-4)GlcNAcβ(1-3)Galβ(1-4)GlcNAcβ(1-3)Galβ(1-3)]-GalNAca-Thr-NH2             |           |
| 38       | NeuAca(2-3)Galβ(1-4)GlcNAcβ(1-3)GalNAca-Thr-NH2                                                                                                                                                                  |           |
| 39       | NeuAca(2-3)Galβ(1-4)GlcNAcβ(1-3)Galβ(1-4)GlcNAcβ(1-3)GalNAca-Thr-NH2                                                                                                                                             |           |
| 40       | NeuAca(2-3)Galβ(1-4)GlcNAcβ(1-3)Galβ(1-4)GlcNAcβ(1-3)GalNAca-Thr-NH2                                                                                                                                             |           |
| 41       | NeuAca(2-3)Galβ(1-4)GlcNAcβ(1-3)Galβ(1-4)GlcNAcβ(1-3)Galβ(1-4)GlcNAcβ(1-3)GalNAca-Thr-NH2                                                                                                                        |           |
| 42       | NeuAca(2-3)Galβ(1-4)GlcNAcβ(1-3)Galβ(1-4)GlcNAcβ(1-3)Galβ(1-4)GlcNAcβ(1-3)Galβ(1-4)GlcNAcβ(1-3)GalNAca-Thr-NH2                                                                                                   |           |
| 43       | NeuAca(2-3)Galβ(1-4)GlcNAcβ(1-3)[NeuAca(2-3)Galβ(1-4)GlcNAcβ(1-6)]-GalNAca-Thr-NH2                                                                                                                               |           |
| 44       | NeuAca(2-3)Galβ(1-4)GlcNAcβ(1-3)Galβ(1-4)GlcNAcβ(1-3)[NeuAca(2-3)Galβ(1-4)GlcNAcβ(1-3)Galβ(1-4)GlcNAcβ(1-6)]-GalNAca-Thr-NH2                                                                                     |           |
| 45       | NeuAca(2-3)Galβ(1-4)GlcNAcβ(1-3)Galβ(1-4)GlcNAcβ(1-3)[NeuAca(2-3)Galβ(1-4)GlcNAcβ(1-3)Galβ(1-4)GlcNAcβ(1-3)Galβ(1-4)GlcNAcβ(1-6)]-GalNAca-Thr-NH2                                                                |           |
| 46       | NeuAca(2-3)Galβ(1-4)GlcNAcβ(1-3)Galβ(1-4)GlcNAcβ(1-3)Galβ(1-4)GlcNAcβ(1-3)[NeuAca(2-3)Galβ(1-4)GlcNAcβ(1-3)Galβ(1-4)GlcNAcβ(1-3)Galβ(1-4)GlcNAcβ(1-3)Galβ(1-4)GlcNAcβ(1-6)]-GalNAca-Thr-NH2                      |           |
| 47       | NeuAca(2-3)Galβ(1-4)GlcNAcβ(1-3)Galβ(1-4)GlcNAcβ(1-3)Galβ(1-4)GlcNAcβ(1-3)[NeuAca(2-3)Galβ(1-4)GlcNAcβ(1-3)Galβ(1-4)GlcNAcβ(1-3)Galβ(1-4)GlcNAcβ(1-3)Galβ(1-4)GlcNAcβ(1-3)Galβ(1-4)GlcNAcβ(1-6)]-GalNAca-Thr-NH2 |           |
| 48       | NeuAca(2-3)Galβ(1-4)GlcNAcβ(1-3)Galβ(1-4)GlcNAcβ(1-3)Galβ(1-4)GlcNAcβ(1-3)Galβ(1-4)GlcNAcβ(1-6)GalNAca-Thr-NH2                                                                                                   |           |

| Glycan # | Common Name                                                                                                                                                                                                                                                                                                                                                 | Structure |
|----------|-------------------------------------------------------------------------------------------------------------------------------------------------------------------------------------------------------------------------------------------------------------------------------------------------------------------------------------------------------------|-----------|
| 49       | NeuAca(2-3)Gal $\beta$ (1-4)GlcNAc $\beta$ (1-3)Gal $\beta$ (1-4)GlcNAc $\beta$ (1-3)Gal $\beta$ (1-4)GlcNAc $\beta$ (1-3)Gal $\beta$ (1-4)GlcNAc $\beta$ (1-3)Gal $\beta$ (1-4)GlcNAc $\beta$ (1-6)GalNaca-Thr-NH <sub>2</sub>                                                                                                                             |           |
| 50       | NeuAca(2-3)Gal $\beta$ (1-3)GlcNAc $\beta$ (1-3)Gal $\beta$ (1-4)GlcNAc $\beta$ (1-6)[NeuAca(2-3)Gal $\beta$ (1-3)GlcNAc $\beta$ (1-3)] Gal $\beta$ (1-4)GlcNAc $\beta$ -ethyl-NH <sub>2</sub>                                                                                                                                                              |           |
| 51       | NeuAca(2-3)Gal $\beta$ (1-4)GlcNAc $\beta$ (1-3)Gal $\beta$ (1-4)GlcNAc $\beta$ (1-3)Gal $\beta$ (1-4)GlcNAc $\beta$ (1-6)[NeuAca(2-3)Gal $\beta$ (1-4)GlcNAc $\beta$ (1-3)Gal $\beta$ (1-4)GlcNAc $\beta$ (1-3)] Gal $\beta$ (1-4)GlcNAc $\beta$ -ethyl-NH <sub>2</sub>                                                                                    |           |
| 52       | NeuAca(2-3)Gal $\beta$ (1-4)GlcNAc $\beta$ (1-2)Mana(1-3)[NeuAca(2-3)Gal $\beta$ (1-4)GlcNAc $\beta$ (1-2)Mana(1-6)]-Man $\beta$ (1-4)GlcNAc $\beta$ -Asn-NH <sub>2</sub>                                                                                                                                                                                   |           |
| 53       | NeuAca(2-3)Gal $\beta$ (1-4)GlcNAc $\beta$ (1-3)Gal $\beta$ (1-4)GlcNAc $\beta$ (1-2)Mana(1-3)[NeuAca(2-3)Gal $\beta$ (1-4)GlcNAc $\beta$ (1-3)Gal $\beta$ (1-4)GlcNAc $\beta$ (1-2)Mana(1-6)]-Man $\beta$ (1-4)GlcNAc $\beta$ -Asn-NH <sub>2</sub>                                                                                                         |           |
| 54       | NeuAca(2-3)Gal $\beta$ (1-4)GlcNAc $\beta$ (1-3)Gal $\beta$ (1-4)GlcNAc $\beta$ (1-3)Gal $\beta$ (1-4)GlcNAc $\beta$ (1-2)Mana(1-3)[NeuAca(2-3)Gal $\beta$ (1-4)GlcNAc $\beta$ (1-3)Gal $\beta$ (1-4)GlcNAc $\beta$ (1-3)Gal $\beta$ (1-4)GlcNAc $\beta$ (1-2)Mana(1-6)]-Man $\beta$ (1-4)GlcNAc $\beta$ -Asn-NH <sub>2</sub>                               |           |
| 55       | NeuAca(2-3)Gal $\beta$ (1-4)GlcNAc $\beta$ (1-3)Gal $\beta$ (1-4)GlcNAc $\beta$ (1-2)Mana(1-3)[NeuAca(2-3)Gal $\beta$ (1-4)GlcNAc $\beta$ (1-3)Gal $\beta$ (1-4)GlcNAc $\beta$ (1-2)Mana(1-6)]-Man $\beta$ (1-4)GlcNAc $\beta$ -(Lys-Val-Ala)Asn-Lys-Thr-NH <sub>2</sub>                                                                                    |           |
| 56       | NeuAca(2-3)Gal $\beta$ (1-4)GlcNAc $\beta$ (1-3)Gal $\beta$ (1-4)GlcNAc $\beta$ (1-3)Gal $\beta$ (1-4)GlcNAc $\beta$ (1-2)Mana(1-3)[NeuAca(2-3)Gal $\beta$ (1-4)GlcNAc $\beta$ (1-3)Gal $\beta$ (1-4)GlcNAc $\beta$ (1-3)Gal $\beta$ (1-4)GlcNAc $\beta$ (1-2)Man $\alpha$ (1-6)]-Man $\beta$ (1-4)GlcNAc $\beta$ -(Lys-Val-Ala)Asn-Lys-Thr-NH <sub>2</sub> |           |
| 57       | NeuAca(2-3)Gal $\beta$ (1-4)GlcNAc $\beta$ (1-3)Gal $\beta$ (1-4)GlcNAc $\beta$ (1-3)Gal $\beta$ (1-4)GlcNAc $\beta$ (1-2)Mana(1-3)[NeuAca(2-3)Gal $\beta$ (1-4)GlcNAc $\beta$ (1-3)Gal $\beta$ (1-4)GlcNAc $\beta$ (1-3)Gal $\beta$ (1-4)GlcNAc $\beta$ (1-2)Man $\alpha$ (1-6)]-Man $\beta$ (1-4)GlcNAc $\beta$ -(Lys-Val-Ala)Asn-Lys-Thr-NH <sub>2</sub> |           |

| Glycan # | Common Name                                                                                                                                                                                                                                                                     | Structure |
|----------|---------------------------------------------------------------------------------------------------------------------------------------------------------------------------------------------------------------------------------------------------------------------------------|-----------|
| 58       | NeuAca(2-3)Galβ(1-4)GlcNAcβ(1-3)Galβ(1-4)GlcNAcβ(1-3)Galβ(1-4)GlcNAcβ(1-3)Galβ(1-4)GlcNAcβ(1-2)Mana(1-3)[NeuAca(2-3)Galβ(1-4)GlcNAcβ(1-3)Galβ(1-4)GlcNAcβ(1-3)Galβ(1-4)GlcNAcβ(1-3)Galβ(1-4)GlcNAcβ(1-2)Mana(1-6)]-Manβ(1-4)GlcNAcβ(1-4)GlcNAcβ-(Lys-Val-Ala)Asn-Lys-Thr-NH2    |           |
| 59       | NeuAca(2-3)Galβ(1-4)GlcNAcβ(1-3)Galβ(1-4)GlcNAcβ(1-3)Galβ(1-4)GlcNAcβ(1-2)Mana(1-3)[NeuAca(2-3)Galβ(1-4)GlcNAcβ(1-3)Galβ(1-4)GlcNAcβ(1-3)Galβ(1-4)GlcNAcβ(1-2)Mana(1-6)]-Manβ(1-4)GlcNAcβ(1-4)[Fuca(1-6)]-GlcNAcβ-(Lys-Val-Ala)Asn-Lys-Thr-NH2                                  |           |
| 60       | NeuAca(2-3)Galβ(1-4)GlcNAcβ(1-3)Galβ(1-4)GlcNAcβ(1-3)Galβ(1-4)GlcNAcβ(1-3)Galβ(1-4)GlcNAcβ(1-2)Mana(1-3)[NeuAca(2-3)Galβ(1-4)GlcNAcβ(1-4)GlcNAcβ(1-3)Galβ(1-4)GlcNAcβ(1-3)Galβ(1-4)GlcNAcβ(1-2)Mana(1-6)]-Manβ(1-4)GlcNAcβ(1-4)[Fuca(1-6)]-GlcNAcβ-(Lys-Val-Ala)Asn-Lys-Thr-NH2 |           |
| 61       | NeuAca(2-3)Galβ(1-4)GlcNAcβ(1-3)Galβ(1-4)GlcNAcβ(1-2)Mana(1-3){NeuAca(2-3)Galβ(1-4)GlcNAcβ(1-3)Galβ(1-4)GlcNAcβ(1-2)[NeuAca(2-3)Galβ(1-4)GlcNAcβ(1-3)Galβ(1-4)GlcNAcβ(1-6)Mana(1-6)]-Manβ(1-4)GlcNAcβ(1-4)GlcNAcβ-(Lys-Val-Ala)Asn-Lys-Thr-NH2                                  |           |
| 62       | NeuAca(2-3)Galβ(1-4)GlcNAcβ(1-3)Galβ(1-4)GlcNAcβ(1-3)Galβ(1-4)GlcNAcβ(1-2)Mana(1-3){NeuAca(2-3)Galβ(1-4)GlcNAcβ(1-3)Galβ(1-4)GlcNAcβ(1-2)[NeuAca(2-3)Galβ(1-4)GlcNAcβ(1-3)Galβ(1-4)GlcNAcβ(1-6)Mana(1-6)]-Manβ(1-4)GlcNAcβ(1-4)GlcNAcβ-(Lys-Val-Ala)Asn-Lys-Thr-NH2             |           |
| 63       | NeuAca(2-3)Galβ(1-4)GlcNAcβ(1-3)Galβ(1-4)GlcNAcβ(1-2)Mana(1-3){NeuAca(2-3)Galβ(1-4)GlcNAcβ(1-3)Galβ(1-4)GlcNAcβ(1-2)[NeuAca(2-3)Galβ(1-4)GlcNAcβ(1-3)Galβ(1-4)GlcNAcβ(1-6)Mana(1-6)]-Manβ(1-4)GlcNAcβ(1-4)[Fuca(1-6)]-GlcNAcβ-(Lys-Val-Ala)Asn-Lys-Thr-NH2                      |           |

| Glycan # | Common Name                                                                                                                                                                                                                                                                                                               | Structure |
|----------|---------------------------------------------------------------------------------------------------------------------------------------------------------------------------------------------------------------------------------------------------------------------------------------------------------------------------|-----------|
| 64       | NeuAca(2-3)Galβ(1-4)GlcNAcβ(1-3)Galβ(1-4)GlcNAcβ(1-3)Galβ(1-4)GlcNAcβ(1-2)Mana(1-3){NeuAca(2-3)Galβ(1-4)GlcNAcβ(1-3)Galβ(1-4)GlcNAcβ(1-3)Galβ(1-4)GlcNAcβ(1-2)[NeuAca(2-3)Galβ(1-4)GlcNAcβ(1-3)Galβ(1-4)GlcNAcβ(1-3)Galβ(1-4)GlcNAcβ(1-6)Mana(1-6)]-Manβ(1-4)GlcNAcβ(1-4)[Fuca(1-6)]-GlcNAcβ-(Lys-Val-Ala)Asn-Lys-Thr-NH2 |           |
| 65       | Gn/3'SLN/3'SLN-TriN                                                                                                                                                                                                                                                                                                       |           |
| 66       | NeuAca(2-3)[GalNAcβ(1-4)]-Galβ(1-4)GlcNAcβ-ethyl-NH2                                                                                                                                                                                                                                                                      |           |
| 67       | NeuAca(2-3)[GalNAcβ(1-4)]-Galβ(1-4)Glcβ-ethyl-NH2                                                                                                                                                                                                                                                                         |           |
| 68       | Galβ(1-3)GalNAcβ(1-4)[NeuAca(2-3)]-Galβ(1-4)Glcβ-ethyl-NH2                                                                                                                                                                                                                                                                |           |
| 69       | NeuAca(2-3)Galβ(1-4)[Fuca(1-3)]-GlcNAcβ-propyl-NH2                                                                                                                                                                                                                                                                        |           |
| 70       | NeuAca(2-3)Galβ(1-3)[Fuca(1-4)]-GlcNAcβ(1-3)Galβ(1-4)[Fuca(1-3)]-GlcNAcβ-ethyl-NH2                                                                                                                                                                                                                                        |           |
| 71       | NeuAca(2-3)Galβ(1-4)[Fuca(1-3)]-GlcNAcβ(1-3)Galβ(1-4)[Fuca(1-3)]-GlcNAcβ-ethyl-NH2                                                                                                                                                                                                                                        |           |
| 72       | NeuAca(2-3)Galβ(1-4)[Fuca(1-3)]-GlcNAcβ(1-3)Galβ(1-4)[Fuca(1-3)]-GlcNAcβ(1-3)Galβ(1-4)[Fuca(1-3)]-GlcNAcβ-ethyl-NH2                                                                                                                                                                                                       |           |
| 73       | NeuAca(2-3)Galβ(1-4)[Fuca(1-3)]-GlcNAcβ(1-3)Galβ(1-4)[Fuca(1-3)]-GlcNAcβ(1-3)Galβ(1-4)[Fuca(1-3)]-GlcNAcβ(1-3)Galβ(1-3)GalNAca-Thr-NH2                                                                                                                                                                                    |           |
| 74       | NeuAca(2-3)Galβ(1-4)[Fuca(1-3)]-GlcNAcβ(1-3)Galβ(1-4)[Fuca(1-3)]-GlcNAcβ(1-3)Galβ(1-4)[Fuca(1-3)]-GlcNAcβ(1-3)GalNAca-Thr-NH2                                                                                                                                                                                             |           |
| 75       | NeuAca(2-3)Galβ(1-4)[Fuca(1-3)]-GlcNAcβ(1-3)Galβ(1-4)[Fuca(1-3)]-GlcNAcβ(1-3)Galβ(1-4)[Fuca(1-3)]-GlcNAcβ(1-3)[NeuAca(2-3)Galβ(1-4)[Fuca(1-3)]-GlcNAcβ(1-3)Galβ(1-4)[Fuca(1-3)]-GlcNAcβ(1-6)]-GalNAca-Thr-NH2                                                                                                             |           |

| Glycan # | Common Name                                                                                                                                                                         | Structure                                                                             |
|----------|-------------------------------------------------------------------------------------------------------------------------------------------------------------------------------------|---------------------------------------------------------------------------------------|
| 76       | NeuAca(2-3)Galβ(1-4)[Fuca(1-3)]-GlcNAcβ(1-2)Mana(1-3)[NeuAca(2-3)Galβ(1-4)[Fuca(1-3)]-GlcNAcβ(1-2)Mana(1-6)]-Manβ(1-4)GlcNAcβ(1-4)GlcNAcβ-(Lys-Val-Ala)Asn-(Lys-Thr)NH <sub>2</sub> | 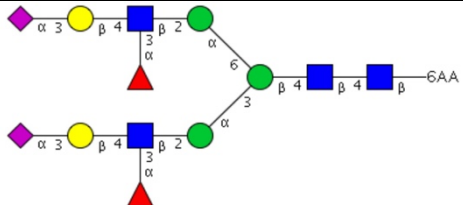   |
| 77       | NeuAca(2-6)Galb(1-4)(6S)GlcNacbethyl-NH <sub>2</sub>                                                                                                                                |    |
| 78       | NeuAca(2-6)Galβ(1-4)6-O-sulfo-GlcNAcβ-propyl-NH <sub>2</sub>                                                                                                                        |    |
| 79       | NeuAca(2-6)Galβ(1-4)Glcβ-ethyl-NH <sub>2</sub>                                                                                                                                      |    |
| 80       | NeuAca(2-6)Galβ(1-4)GlcNAcβ-ethyl-NH <sub>2</sub>                                                                                                                                   |    |
| 81       | NeuAca(2-6)Galβ(1-4)GlcNAcβ(1-3)Galβ(1-4)GlcNAcβ-ethyl-NH <sub>2</sub>                                                                                                              |    |
| 82       | NeuAca(2-6)Galβ(1-4)GlcNAcβ(1-3)Galβ(1-4)GlcNAcβ(1-3)Galβ(1-4)GlcNAcβ-ethyl-NH <sub>2</sub>                                                                                         |    |
| 83       | NeuAca(2-6)GalNAcβ(1-4)GlcNAcβ-ethyl-NH <sub>2</sub>                                                                                                                                |    |
| 84       | NeuAca(2-6)Galβ(1-4)GlcNAcβ(1-3)Galβ(1-3)GalNAca-Thr-NH <sub>2</sub>                                                                                                                |    |
| 85       | NeuAca(2-6)Galβ(1-4)GlcNAcβ(1-3)Galβ(1-3)GalNAca-Thr-NH <sub>2</sub>                                                                                                                |    |
| 86       | NeuAca(2-6)Galβ(1-4)GlcNAcβ(1-3)Galβ(1-4)GlcNAcβ(1-3)Galβ(1-3)GalNAca-Thr-NH <sub>2</sub>                                                                                           |   |
| 87       | NeuAca(2-6)Galβ(1-4)GlcNAcβ(1-3)Galβ(1-4)GlcNAcβ(1-3)Galβ(1-4)GlcNAcβ(1-3)Galβ(1-3)GalNAca-Thr-NH <sub>2</sub>                                                                      |   |
| 88       | NeuAca(2-6)Galβ(1-4)GlcNAcβ(1-3)Galβ(1-4)GlcNAcβ(1-3)Galβ(1-4)GlcNAcβ(1-3)Galβ(1-4)GlcNAcβ(1-3)Galβ(1-3)GalNAca-Thr-NH <sub>2</sub>                                                 |   |
| 89       | NeuAca(2-6)Galβ(1-4)GlcNAcβ(1-6)[Galβ(1-3)]-GalNAca-Thr-NH <sub>2</sub>                                                                                                             |  |
| 90       | NeuAca(2-6)Galβ(1-4)GlcNAcβ(1-3)Galβ(1-4)GlcNAcβ(1-6)[Galβ(1-3)]-GalNAca-Thr-NH <sub>2</sub>                                                                                        |  |
| 91       | NeuAca(2-6)Galβ(1-4)GlcNAcβ(1-3)Galβ(1-4)GlcNAcβ(1-6)[Galβ(1-3)]-GalNAca-Thr-NH <sub>2</sub>                                                                                        |   |
| 92       | NeuAca(2-6)Galβ(1-4)GlcNAcβ(1-3)Galβ(1-4)GlcNAcβ(1-3)Galβ(1-4)GlcNAcβ(1-6)[Galβ(1-3)]-GalNAca-Thr-NH <sub>2</sub>                                                                   |   |

| Glycan # | Common Name                                                                                                                                                                                                                                                                                                                                                                   | Structure |
|----------|-------------------------------------------------------------------------------------------------------------------------------------------------------------------------------------------------------------------------------------------------------------------------------------------------------------------------------------------------------------------------------|-----------|
| 93       | NeuAca(2-6)Gal $\beta$ (1-4)GlcNAc $\beta$ (1-3)Gal $\beta$ (1-4)GlcNAc $\beta$ (1-3)Gal $\beta$ (1-4)GlcNAc $\beta$ (1-3)Gal $\beta$ (1-4)GlcNAc $\beta$ (1-3)Gal $\beta$ (1-4)GlcNAc $\beta$ (1-6)[Gal $\beta$ (1-3)]-GalNAca-Thr-NH <sub>2</sub>                                                                                                                           |           |
| 94       | NeuAca(2-6)Gal $\beta$ (1-4)GlcNAc $\beta$ (1-3)Gal $\beta$ (1-4)GlcNAc $\beta$ (1-3)Gal $\beta$ (1-4)GlcNAc $\beta$ (1-3)Gal $\beta$ (1-4)GlcNAc $\beta$ (1-6)[NeuAca(2-6)Gal $\beta$ (1-4)GlcNAc $\beta$ (1-3)Gal $\beta$ (1-4)GlcNAc $\beta$ (1-3)Gal $\beta$ (1-4)GlcNAc $\beta$ (1-3)Gal $\beta$ (1-4)GlcNAc $\beta$ (1-3)Gal $\beta$ (1-3)]-GalNAca-Thr-NH <sub>2</sub> |           |
| 95       | NeuAca(2-6)Gal $\beta$ (1-4)GlcNAc $\beta$ (1-3)Gal $\beta$ (1-4)GlcNAc $\beta$ (1-3)Gal $\beta$ (1-4)GlcNAc $\beta$ (1-3)Gal $\beta$ (1-4)GlcNAc $\beta$ (1-6)[NeuAca(2-6)Gal $\beta$ (1-4)GlcNAc $\beta$ (1-3)Gal $\beta$ (1-4)GlcNAc $\beta$ (1-3)Gal $\beta$ (1-4)GlcNAc $\beta$ (1-3)Gal $\beta$ (1-4)GlcNAc $\beta$ (1-3)Gal $\beta$ (1-3)]-GalNAca-Thr-NH <sub>2</sub> |           |
| 96       | NeuAca(2-6)Gal $\beta$ (1-4)GlcNAc $\beta$ (1-3)GalNAca-Thr-NH <sub>2</sub>                                                                                                                                                                                                                                                                                                   |           |
| 97       | NeuAca(2-6)Gal $\beta$ (1-4)GlcNAc $\beta$ (1-3)Gal $\beta$ (1-4)GlcNAc $\beta$ (1-3)GalNAca-Thr-NH <sub>2</sub>                                                                                                                                                                                                                                                              |           |
| 98       | NeuAca(2-6)Gal $\beta$ (1-4)GlcNAc $\beta$ (1-3)Gal $\beta$ (1-4)GlcNAc $\beta$ (1-3)Gal $\beta$ (1-4)GlcNAc $\beta$ (1-3)GalNAca-Thr-NH <sub>2</sub>                                                                                                                                                                                                                         |           |
| 99       | NeuAca(2-6)Gal $\beta$ (1-4)GlcNAc $\beta$ (1-3)Gal $\beta$ (1-4)GlcNAc $\beta$ (1-3)Gal $\beta$ (1-4)GlcNAc $\beta$ (1-3)Gal $\beta$ (1-4)GlcNAc $\beta$ (1-3)GalNAca-Thr-NH <sub>2</sub>                                                                                                                                                                                    |           |
| 100      | NeuAca(2-6)Gal $\beta$ (1-4)GlcNAc $\beta$ (1-3)Gal $\beta$ (1-4)GlcNAc $\beta$ (1-3)Gal $\beta$ (1-4)GlcNAc $\beta$ (1-3)Gal $\beta$ (1-4)GlcNAc $\beta$ (1-3)GalNAca-Thr-NH <sub>2</sub>                                                                                                                                                                                    |           |
| 101      | NeuAca(2-6)Gal $\beta$ (1-4)GlcNAc $\beta$ (1-3)[NeuAca(2-6)Gal $\beta$ (1-4)GlcNAc $\beta$ (1-6)]-GalNAca-Thr-NH <sub>2</sub>                                                                                                                                                                                                                                                |           |
| 102      | NeuAca(2-6)Gal $\beta$ (1-4)GlcNAc $\beta$ (1-3)Gal $\beta$ (1-4)GlcNAc $\beta$ (1-3)[NeuAca(2-6)Gal $\beta$ (1-4)GlcNAc $\beta$ (1-3)Gal $\beta$ (1-4)GlcNAc $\beta$ (1-6)]-GalNAca-Thr-NH <sub>2</sub>                                                                                                                                                                      |           |
| 103      | NeuAca(2-6)Gal $\beta$ (1-4)GlcNAc $\beta$ (1-3)Gal $\beta$ (1-4)GlcNAc $\beta$ (1-3)Gal $\beta$ (1-4)GlcNAc $\beta$ (1-3)[NeuAca(2-6)Gal $\beta$ (1-4)GlcNAc $\beta$ (1-3)Gal $\beta$ (1-4)GlcNAc $\beta$ (1-3)Gal $\beta$ (1-4)GlcNAc $\beta$ (1-6)]-GalNAca-Thr-NH <sub>2</sub>                                                                                            |           |
| 104      | NeuAca(2-6)Gal $\beta$ (1-4)GlcNAc $\beta$ (1-3)Gal $\beta$ (1-4)GlcNAc $\beta$ (1-3)Gal $\beta$ (1-4)GlcNAc $\beta$ (1-3)Gal $\beta$ (1-4)GlcNAc $\beta$ (1-3)[NeuAca(2-6)Gal $\beta$ (1-4)GlcNAc $\beta$ (1-3)Gal $\beta$ (1-4)GlcNAc $\beta$ (1-3)Gal $\beta$ (1-4)GlcNAc $\beta$ (1-3)Gal $\beta$ (1-4)GlcNAc $\beta$ (1-6)]-GalNAca-Thr-NH <sub>2</sub>                  |           |



| Glycan # | Common Name                                                                                                                                                                                                                                                | Structure |
|----------|------------------------------------------------------------------------------------------------------------------------------------------------------------------------------------------------------------------------------------------------------------|-----------|
| 105      | NeuAca(2-6)Galβ(1-4)GlcNAcβ(1-3)Galβ(1-4)GlcNAcβ(1-3)Galβ(1-4)GlcNAcβ(1-3)Galβ(1-4)GlcNAcβ(1-3)[NeuAca(2-6)Galβ(1-4)GlcNAcβ(1-3)Galβ(1-4)GlcNAcβ(1-3)Galβ(1-4)GlcNAcβ(1-3)Galβ(1-4)GlcNAcβ(1-3)Galβ(1-4)GlcNAcβ(1-3)Galβ(1-4)GlcNAcβ(1-6)]-GalNAca-Thr-NH2 |           |
| 106      | NeuAca(2-6)Galβ(1-4)GlcNAcβ(1-3)Galβ(1-4)GlcNAcβ(1-3)Galβ(1-4)GlcNAcβ(1-3)Galβ(1-4)GlcNAcβ(1-6)GalNAca-Thr-NH2                                                                                                                                             |           |
| 107      | NeuAca(2-6)Galβ(1-4)GlcNAcβ(1-3)Galβ(1-4)GlcNAcβ(1-3)Galβ(1-4)GlcNAcβ(1-3)Galβ(1-4)GlcNAcβ(1-3)Galβ(1-4)GlcNAcβ(1-6)GalNAca-Thr-NH2                                                                                                                        |           |
| 108      | NeuAca(2-6)Galβ(1-4)GlcNAcβ(1-3)Galβ(1-4)GlcNAcβ(1-3)Galβ(1-4)GlcNAcβ(1-6)[NeuAca(2-6)Galβ(1-4)GlcNAcβ(1-3)Galβ(1-4)GlcNAcβ(1-3)] Galβ(1-4)GlcNAcβ-ethyl-NH2                                                                                               |           |
| 109      | NeuAca(2-6)Galβ(1-3)GlcNAcβ(1-3)Galβ(1-4)GlcNAcβ(1-6)[NeuAca(2-6)Galβ(1-3)GlcNAcβ(1-3)] Galβ(1-4)GlcNAcβ-ethyl-NH2                                                                                                                                         |           |
| 110      | Galβ(1-4)GlcNAcβ(1-2)Mana(1-3)[NeuAca(2-6)Galβ(1-4)GlcNAcβ(1-2)Mana(1-6)]-Manβ(1-4)GlcNAcβ(1-4)GlcNAcβ-Asn-NH2                                                                                                                                             |           |
| 111      | NeuAca(2-6)Galβ(1-4)GlcNAcβ(1-2)Mana(1-3)[Galβ(1-4)GlcNAcβ(1-2)Mana(1-6)]-Manβ(1-4)GlcNAcβ(1-4)GlcNAcβ-Asn-NH2                                                                                                                                             |           |
| 112      | GlcNAcβ(1-2)Mana(1-3)[NeuAca(2-6)Galβ(1-4)GlcNAcβ(1-2)Mana(1-6)]-Manβ(1-4)GlcNAcβ(1-4)GlcNAcβ-Asn-NH2                                                                                                                                                      |           |
| 113      | NeuAca(2-6)Galβ(1-4)GlcNAcβ(1-2)Mana(1-3)[NeuAca(2-6)Galβ(1-4)GlcNAcβ(1-2)Mana(1-6)]-Manβ(1-4)GlcNAcβ(1-4)GlcNAcβ-Asn-NH2                                                                                                                                  |           |
| 114      | NeuAca(2-6)Galβ(1-4)GlcNAcβ(1-3)Galβ(1-4)GlcNAcβ(1-2)Mana(1-3)[NeuAca(2-6)Galβ(1-4)GlcNAcβ(1-3)Galβ(1-4)GlcNAcβ(1-2)Mana(1-6)]-Manβ(1-4)GlcNAcβ(1-4)GlcNAcβ-Asn-NH2                                                                                        |           |
| 115      | NeuAca(2-6)Galβ(1-4)GlcNAcβ(1-3)Galβ(1-4)GlcNAcβ(1-2)Mana(1-3)[NeuAca(2-6)Galβ(1-4)GlcNAcβ(1-3)Galβ(1-4)GlcNAcβ(1-2)Mana(1-6)]-Manβ(1-4)GlcNAcβ(1-4)GlcNAcβ-(Lys-Val-Ala)Asn-Lys-Thr-NH2                                                                   |           |

| Glycan # | Common Name                                                                                                                                                                                                                                                                                                            | Structure |
|----------|------------------------------------------------------------------------------------------------------------------------------------------------------------------------------------------------------------------------------------------------------------------------------------------------------------------------|-----------|
| 116      | NeuAca(2-6)Galβ(1-4)GlcNAcβ(1-3)Galβ(1-4)GlcNAcβ(1-3)Galβ(1-4)GlcNAcβ(1-2)Mana(1-3)[NeuAca(2-6)Galβ(1-4)GlcNAcβ(1-3)Galβ(1-4)GlcNAcβ(1-3)Galβ(1-4)GlcNAcβ(1-2)Mana(1-6)]-Manβ(1-4)GlcNAcβ(1-4)GlcNAcβ-Asn-NH2                                                                                                          |           |
| 117      | NeuAca(2-6)Galβ(1-4)GlcNAcβ(1-3)Galβ(1-4)GlcNAcβ(1-3)Galβ(1-4)GlcNAcβ(1-2)Mana(1-3)[NeuAca(2-6)Galβ(1-4)GlcNAcβ(1-3)Galβ(1-4)GlcNAcβ(1-3)Galβ(1-4)GlcNAcβ(1-2)Mana(1-6)]-Manβ(1-4)GlcNAcβ(1-4)GlcNAcβ-(Lys-Val-Ala)Asn-Lys-Thr-NH2                                                                                     |           |
| 118      | NeuAca(2-6)Galβ(1-4)GlcNAcβ(1-3)Galβ(1-4)GlcNAcβ(1-3)Galβ(1-4)GlcNAcβ(1-3)Galβ(1-4)GlcNAcβ(1-2)Mana(1-3)[NeuAca(2-6)Galβ(1-4)GlcNAcβ(1-3)Galβ(1-4)GlcNAcβ(1-3)Galβ(1-4)GlcNAcβ(1-3)Galβ(1-4)GlcNAcβ(1-2)Mana(1-6)]-Manβ(1-4)GlcNAcβ(1-4)GlcNAcβ-(Lys-Val-Ala)Asn-Lys-Thr-NH2                                           |           |
| 119      | NeuAca(2-6)Galβ(1-4)GlcNAcβ(1-3)Galβ(1-4)GlcNAcβ(1-3)Galβ(1-4)GlcNAcβ(1-3)Galβ(1-4)GlcNAcβ(1-3)Galβ(1-4)GlcNAcβ(1-2)Mana(1-3)[NeuAca(2-6)Galβ(1-4)GlcNAcβ(1-3)Galβ(1-4)GlcNAcβ(1-3)Galβ(1-4)GlcNAcβ(1-3)Galβ(1-4)GlcNAcβ(1-3)Galβ(1-4)GlcNAcβ(1-2)Mana(1-6)]-Manβ(1-4)GlcNAcβ(1-4)GlcNAcβ-(Lys-Val-Ala)Asn-Lys-Thr-NH2 |           |
| 120      | NeuAca(2-6)Galβ(1-4)GlcNAcβ(1-3)Galβ(1-4)GlcNAcβ(1-2)Mana(1-3)[NeuAca(2-6)Galβ(1-4)GlcNAcβ(1-3)Galβ(1-4)GlcNAcβ(1-2)Mana(1-6)]-Manβ(1-4)GlcNAcβ(1-4)[Fuca(1-6)]-GlcNAcβ-(Lys-Val-Ala)Asn-Lys-Thr-NH2                                                                                                                   |           |
| 121      | NeuAca(2-6)Galβ(1-4)GlcNAcβ(1-3)Galβ(1-4)GlcNAcβ(1-3)Galβ(1-4)GlcNAcβ(1-2)Mana(1-3)[NeuAca(2-6)Galβ(1-4)GlcNAcβ(1-3)Galβ(1-4)GlcNAcβ(1-3)Galβ(1-4)GlcNAcβ(1-2)Mana(1-6)]-Manβ(1-4)GlcNAcβ(1-4)[Fuca(1-6)]-GlcNAcβ-(Lys-Val-Ala)Asn-Lys-Thr-NH2                                                                         |           |

| Glycan # | Common Name                                                                                                                                                                                                                                                                                                       | Structure |
|----------|-------------------------------------------------------------------------------------------------------------------------------------------------------------------------------------------------------------------------------------------------------------------------------------------------------------------|-----------|
| 122      | NeuAca(2-6)Galβ(1-4)GlcNAcβ(1-3)Galβ(1-4)GlcNAcβ(1-3)Galβ(1-4)GlcNAcβ(1-2)Mana(1-3)[NeuAca(2-6)Galβ(1-4)GlcNAcβ(1-3)Galβ(1-4)GlcNAcβ(1-3)Galβ(1-4)GlcNAcβ(1-2)Mana(1-6)]-Manβ(1-4)GlcNAcβ(1-4)[Fuca(1-6)]-GlcNAcβ-(Lys-Val-Ala)Asn-Lys-Thr-NH <sub>2</sub>                                                        |           |
| 123      | NeuAca(2-6)Galβ(1-4)GlcNAcβ(1-3)Galβ(1-4)GlcNAcβ(1-2)Mana(1-3){NeuAca(2-6)Galβ(1-4)GlcNAcβ(1-3)Galβ(1-4)GlcNAcβ(1-2)[NeuAca(2-6)Galβ(1-4)GlcNAcβ(1-3)Galβ(1-4)GlcNAcβ(1-6)Mana(1-6)]}-Manβ(1-4)GlcNAcβ(1-4)GlcNAcβ-(Lys-Val-Ala)Asn-Lys-Thr-NH <sub>2</sub>                                                       |           |
| 124      | NeuAca(2-6)Galβ(1-4)GlcNAcβ(1-3)Galβ(1-4)GlcNAcβ(1-2)Mana(1-3){NeuAca(2-6)Galβ(1-4)GlcNAcβ(1-3)Galβ(1-4)GlcNAcβ(1-2)[NeuAca(2-6)Galβ(1-4)GlcNAcβ(1-3)Galβ(1-4)GlcNAcβ(1-6)Mana(1-6)]}-Manβ(1-4)GlcNAcβ(1-4)[Fuca(1-6)]-GlcNAcβ-(Lys-Val-Ala)Asn-Lys-Thr-NH <sub>2</sub>                                           |           |
| 125      | NeuAca(2-6)Galβ(1-4)GlcNAcβ(1-3)Galβ(1-4)GlcNAcβ(1-3)Galβ(1-4)GlcNAcβ(1-2)Mana(1-3){NeuAca(2-6)Galβ(1-4)GlcNAcβ(1-3)Galβ(1-4)GlcNAcβ(1-2)[NeuAca(2-6)Galβ(1-4)GlcNAcβ(1-3)Galβ(1-4)GlcNAcβ(1-3)Galβ(1-4)GlcNAcβ(1-6)Mana(1-6)]}-Manβ(1-4)GlcNAcβ(1-4)[Fuca(1-6)]-GlcNAcβ-(Lys-Val-Ala)Asn-Lys-Thr-NH <sub>2</sub> |           |
| 126      | LN/6'SLN/6'SLN-TriN                                                                                                                                                                                                                                                                                               |           |
| 127      | 6'SLN/LeX/LeX-TriN                                                                                                                                                                                                                                                                                                |           |
| 128      | 6'SLNLN/LeX/LeX-TriN                                                                                                                                                                                                                                                                                              |           |
